# Supplementary material for: Sports Participation and Beliefs about Male Dominance: A Cross-National Analysis of Sexist Gender Ideologies
Source: MDPI journal article supplement (doi:10.3390/socsci12040207), 2023-04-03
Supplement: s1 [file s1]

Archive with 1 entries (1 files):
- socsci-2190255 final_Supplementary_Revised.pdf
