# Supplementary material for: Sports Participation and Beliefs about Male Dominance: A Cross-National Analysis of Sexist Gender Ideologies
Source: MDPI journal article supplement (doi:10.3390/socsci12040207), 2023-04-03
Supplement: s1 [file s1 › socsci-2190255 final_Supplementary_Revised.pdf]

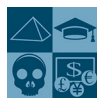

## Supplementary Material

### Additional robustness checks

#### 1. Fixed effects models

**Table S1.** Partial effects of sports participation on sexist gender ideologies. Results from the fixed effects models. Subpopulations: Men, women, and women excluding observations from South Africa. Source: WVS-EVS-data.

|                                                                                       | FE Model<br>1<br>Men | FE Model<br>2<br>Women | FE Model<br>3<br>Women<br>excluding<br>observa-<br>tions<br>from<br>South Af-<br>rica |
|---------------------------------------------------------------------------------------|----------------------|------------------------|---------------------------------------------------------------------------------------|
| Sports participation (ref. category: "Not a member")                                  |                      |                        |                                                                                       |
| Inactive member                                                                       | 0.083<br>(0.042)     | 0.121<br>(0.062)       | 0.063<br>(0.042)                                                                      |
| Active member                                                                         | 0.088*<br>(0.039)    | 0.029<br>(0.050)       | -0.003<br>(0.041)                                                                     |
| Membership in other leisure clubs or organizations<br>(ref. category: "Not a member") |                      |                        |                                                                                       |
| Inactive member                                                                       | -0.030<br>(0.029)    | -0.055<br>(0.034)      | -0.045<br>(0.035)                                                                     |
| Active member                                                                         | -0.087*<br>(0.036)   | -0.109**<br>(0.039)    | -0.138***<br>(0.029)                                                                  |
| Age / 10                                                                              | 0.020<br>(0.013)     | 0.086***<br>(0.012)    | 0.090***<br>(0.012)                                                                   |

Robust standard errors in parentheses; \*  $p < 0.05$ , \*\*  $p < 0.01$ , \*\*\*  $p < 0.001$ ; the coefficients of the dummy variables for the years 2006–2016 have been omitted from the table due to limited space.

#### 2. Models based on observations from countries with at least 30 inactive and 30 active members

##### 2.1 Results for men

**Table S2.** The partial effects of sports participation and the other covariates on sexist gender ideologies. Random coefficient models based on male observations from 62 countries. Only observations from countries with at least 30 active and 30 inactive male members of sports clubs were included. Source: WVS-EVS-data and V-Dem data.

|                                                                                    | Model 1 | Model 2 | Model 3 | Model 4 | Model 5 |
|------------------------------------------------------------------------------------|---------|---------|---------|---------|---------|
| Membership in other leisure clubs or organizations (ref. category: "Not a member") |         |         |         |         |         |

|                                                                |                      |                      |                      |                      |                      |
|----------------------------------------------------------------|----------------------|----------------------|----------------------|----------------------|----------------------|
| Inactive member                                                | 0.003<br>(0.032)     | -0.025<br>(0.030)    | -0.029<br>(0.030)    | -0.025<br>(0.031)    | -0.030<br>(0.031)    |
| Active member                                                  | -0.053<br>(0.041)    | -0.085*<br>(0.038)   | -0.094*<br>(0.037)   | -0.092*<br>(0.037)   | -0.095**<br>(0.037)  |
| Age / 10                                                       | 0.019<br>(0.015)     | 0.022<br>(0.015)     | 0.022<br>(0.015)     | 0.023<br>(0.015)     | 0.022<br>(0.015)     |
| Educational level (ref. category: "Incomplete primary school") |                      |                      |                      |                      |                      |
| Complete primary school                                        | -0.072<br>(0.069)    | -0.072<br>(0.070)    | -0.073<br>(0.070)    | -0.075<br>(0.071)    | -0.074<br>(0.070)    |
| Incomplete secondary school: techn. /<br>vocat. type           | -0.207**<br>(0.077)  | -0.209**<br>(0.077)  | -0.207**<br>(0.077)  | -0.215**<br>(0.077)  | -0.207**<br>(0.077)  |
| Complete secondary school: techn./<br>vocat. type              | -0.367***<br>(0.077) | -0.371***<br>(0.077) | -0.368***<br>(0.076) | -0.372***<br>(0.076) | -0.371***<br>(0.076) |
| Incomplete secondary school: univer-<br>sity-prep. type        | -0.355***<br>(0.092) | -0.360***<br>(0.091) | -0.355***<br>(0.090) | -0.356***<br>(0.090) | -0.354***<br>(0.091) |
| Complete secondary school: univer-<br>sity-prep. type          | -0.449***<br>(0.078) | -0.455***<br>(0.077) | -0.453***<br>(0.077) | -0.458***<br>(0.077) | -0.455***<br>(0.077) |
| Some university-level education, with-<br>out degree           | -0.564***<br>(0.090) | -0.570***<br>(0.089) | -0.567***<br>(0.089) | -0.574***<br>(0.089) | -0.575***<br>(0.089) |
| University - level education, with de-<br>gree                 | -0.742***<br>(0.087) | -0.748***<br>(0.087) | -0.746***<br>(0.086) | -0.744***<br>(0.086) | -0.745***<br>(0.086) |
| Income decile (self-perceived)                                 | -0.001<br>(0.009)    | -0.002<br>(0.009)    | -0.001<br>(0.009)    | -0.004<br>(0.009)    | -0.001<br>(0.009)    |
| Unemployed                                                     | 0.083<br>(0.047)     | 0.086<br>(0.047)     | 0.086<br>(0.047)     | 0.078<br>(0.047)     | 0.084<br>(0.048)     |
| Married                                                        | -0.078**<br>(0.028)  | -0.076**<br>(0.028)  | -0.074**<br>(0.027)  | -0.072**<br>(0.027)  | -0.074**<br>(0.027)  |
| Child                                                          | 0.045<br>(0.033)     | 0.046<br>(0.033)     | 0.048<br>(0.033)     | 0.046<br>(0.032)     | 0.046<br>(0.033)     |
| Religious                                                      | 0.132**<br>(0.048)   | 0.132**<br>(0.048)   | 0.131**<br>(0.048)   | 0.127**<br>(0.048)   | 0.130**<br>(0.048)   |
| Sports participation (ref. category: "Not a member")           |                      |                      |                      |                      |                      |
| Active member                                                  |                      | 0.091*<br>(0.040)    | 0.086*<br>(0.038)    | -0.079<br>(0.160)    | -0.050<br>(0.076)    |
| Inactive member                                                |                      | 0.088*<br>(0.043)    | 0.107*<br>(0.045)    | 0.074<br>(0.065)     | -0.015<br>(0.074)    |
| Deciles of WPE Index (ref. category= 1st decile)               |                      |                      |                      |                      |                      |
| 2nd decile                                                     |                      |                      |                      | -0.422***<br>(0.105) |                      |
| 3rd decile                                                     |                      |                      |                      | -2.178***<br>(0.456) |                      |
| 4th decile                                                     |                      |                      |                      | -2.040***<br>(0.404) |                      |
| 5th decile                                                     |                      |                      |                      | -1.642***<br>(0.391) |                      |
| 6th decile                                                     |                      |                      |                      | -1.497***<br>(0.391) |                      |
| 7th decile                                                     |                      |                      |                      | -1.959***            |                      |

---

|                                             |           |
|---------------------------------------------|-----------|
|                                             | (0.370)   |
| 8th decile                                  | -1.855*** |
|                                             | (0.388)   |
| 9th decile                                  | -3.071*** |
|                                             | (0.439)   |
| 10th decile                                 | -1.670*** |
| Sports participation × deciles of WPE Index | (0.432)   |
| Inactive member × 2nd decile of WPE Index   | -0.168    |
|                                             | (0.126)   |
| Inactive member × 3rd decile of WPE Index   | -0.017    |
|                                             | (0.169)   |
| Inactive member × 4th decile of WPE Index   | 0.008     |
|                                             | (0.104)   |
| Inactive member × 5th decile of WPE Index   | 0.308     |
|                                             | (0.170)   |
| Inactive member × 6th decile of WPE Index   | -0.044    |
|                                             | (0.137)   |
| Inactive member × 7th decile of WPE Index   | -0.001    |
|                                             | (0.112)   |
| Inactive member × 8th decile of WPE Index   | 0.031     |
|                                             | (0.101)   |
| Inactive member × 9th decile of WPE Index   | 0.079     |
|                                             | (0.160)   |
| Inactive member × 10th decile of WPE Index  | 0.120     |
|                                             | (0.157)   |
| Active member × 2nd decile of WPE Index     | 0.253     |
|                                             | (0.209)   |
| Active member × 3rd decile of WPE Index     | 0.217     |
|                                             | (0.215)   |
| Active member × 4th decile of WPE Index     | 0.260     |
|                                             | (0.179)   |
| Active member × 5th decile of WPE Index     | 0.283     |
|                                             | (0.181)   |
| Active member × 6th decile of WPE Index     | 0.270     |
|                                             | (0.220)   |
| Active member × 7th decile of WPE Index     | 0.113     |
|                                             | (0.198)   |
| Active member × 8th decile of WPE Index     | 0.022     |
|                                             | (0.169)   |
| Active member × 9th decile of WPE           | 0.177     |

|                                                     |          |
|-----------------------------------------------------|----------|
| Index                                               |          |
|                                                     | (0.183)  |
| Active member × 10th decile of WPE                  |          |
| Index                                               | 0.071    |
|                                                     | (0.185)  |
| Deciles of EG Index (reference category=1st decile) |          |
| 2nd decile                                          | 0.406**  |
|                                                     | (0.132)  |
| 3rd decile                                          | 0.397    |
|                                                     | (0.204)  |
| 4th decile                                          | 0.349    |
|                                                     | (0.267)  |
| 5th decile                                          | 1.705*** |
|                                                     | (0.477)  |
| 6th decile                                          | 1.629*** |
|                                                     | (0.467)  |
| 7th decile                                          | 2.354*** |
|                                                     | (0.486)  |
| 8th decile                                          | 1.326**  |
|                                                     | (0.436)  |
| 9th decile                                          | 1.554*** |
|                                                     | (0.450)  |
| 10th decile                                         | 3.038*** |
|                                                     | (0.610)  |
| Sports participation × decile of EG Index           |          |
| Inactive member × 2nd decile of EG Index            | 0.293    |
|                                                     | (0.179)  |
| Inactive member × 3rd decile of EG Index            | -0.041   |
|                                                     | (0.103)  |
| Inactive member × 4th decile of EG Index            | 0.369**  |
|                                                     | (0.141)  |
| Inactive member × 5th decile of EG Index            | 0.137    |
|                                                     | (0.229)  |
| Inactive member × 6th decile of EG Index            | 0.242*   |
|                                                     | (0.102)  |
| Inactive member × 7th decile of EG Index            | 0.130    |
|                                                     | (0.133)  |
| Inactive member × 8th decile of EG Index            | 0.039    |
|                                                     | (0.170)  |
| Inactive member × 9th decile of EG Index            | -0.200   |
|                                                     | (0.148)  |
| Inactive member × 10th decile of EG Index           | 0.162    |
|                                                     | (0.105)  |
| Active member × 2nd decile of EG Index              | 0.213*   |
|                                                     | (0.104)  |

|                                                                  |                     |                     |                      |                      |                      |
|------------------------------------------------------------------|---------------------|---------------------|----------------------|----------------------|----------------------|
| Active member × 3rd decile of EG Index                           |                     |                     |                      |                      | 0.034<br>(0.096)     |
| Active member × 4th decile of EG Index                           |                     |                     |                      |                      | 0.319***<br>(0.086)  |
| Active member × 5th decile of EG Index                           |                     |                     |                      |                      | 0.035<br>(0.175)     |
| Active member × 6th decile of EG Index                           |                     |                     |                      |                      | 0.095<br>(0.099)     |
| Active member × 7th decile of EG Index                           |                     |                     |                      |                      | 0.370**<br>(0.139)   |
| Active member × 8th decile of EG Index                           |                     |                     |                      |                      | 0.185<br>(0.170)     |
| Active member × 9th decile of EG Index                           |                     |                     |                      |                      | 0.149<br>(0.087)     |
| Active member × 10th decile of EG Index                          |                     |                     |                      |                      | 0.042<br>(0.193)     |
| Intercept                                                        | 5.058***<br>(0.241) | 5.038***<br>(0.241) | 5.038***<br>(0.240)  | 6.763***<br>(0.373)  | 3.744***<br>(0.261)  |
| Random coefficients:                                             |                     |                     |                      |                      |                      |
| Log. standard deviation of random intercept: $\hat{\sigma}_{u0}$ | 0.362***<br>(0.068) | 0.364***<br>(0.068) | -1.596***<br>(0.190) | -1.631***<br>(0.231) | -1.791***<br>(0.253) |
| Log. standard deviation of residuals: $\hat{\sigma}_{\epsilon}$  | 0.621***<br>(0.024) | 0.621***<br>(0.024) | 0.619***<br>(0.024)  | 0.618***<br>(0.024)  | 0.619***<br>(0.024)  |
| Log. standard deviation of inactive member: $\hat{\sigma}_{u1}$  |                     |                     | -1.321***<br>(0.190) | -1.354***<br>(0.173) | -1.453***<br>(0.184) |
| Log. standard deviation of active member: $\hat{\sigma}_{u2}$    |                     |                     | 0.360***<br>(0.067)  | 0.196<br>(0.101)     | 0.069<br>(0.097)     |
| N                                                                | 51050               | 51050               | 51050                | 51050                | 51050                |
| AIC                                                              | 208706.9            | 208690.7            | 208613.0             | 208561.0             | 208584.7             |
| BIC                                                              | 208927.9            | 208929.4            | 208869.4             | 209056.1             | 209079.8             |

Robust standard errors in parentheses; \*  $p < 0.05$ , \*\*  $p < 0.01$ , \*\*\*  $p < 0.001$ ; the coefficients of the dummy variables for the years 2006-2016 have been omitted from the table due to limited space.

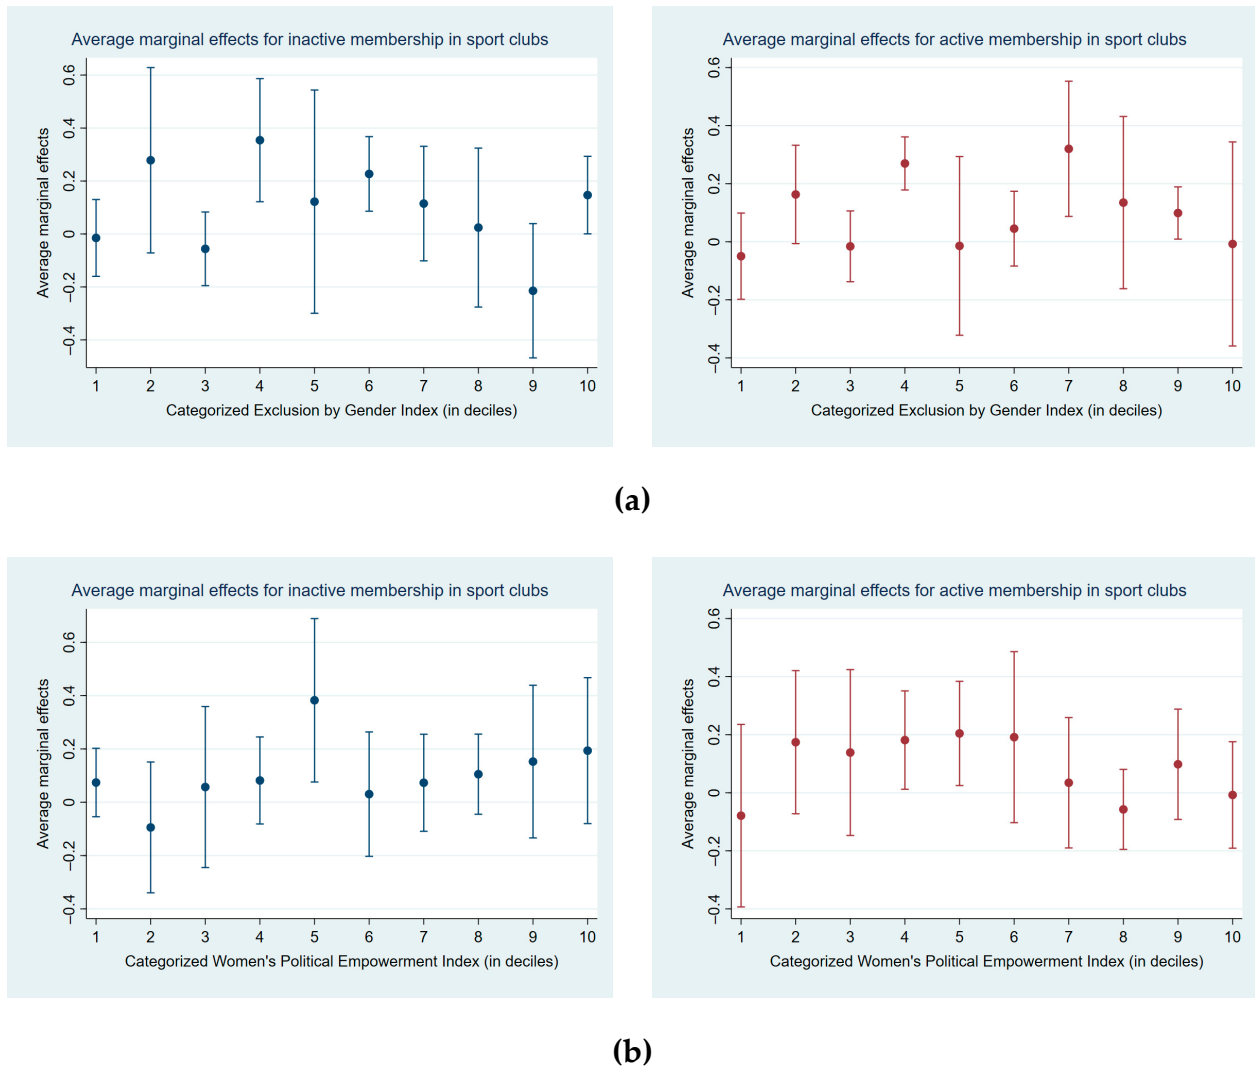

**Figure S1.** Average marginal effects for active and inactive membership in sports clubs conditioned on the deciles of the Exclusion by Gender Index (a) and conditioned on the deciles of the Women's Political Empowerment Index (b). 95% confidence intervals using robust standard errors. Only male observations from countries having at least 30 active and 30 inactive male sports club members included. Source: WVS-EVS-data.

## 2.2 Results for women

**Table S3.** The partial effects of sports participation and the other covariates on sexist gender ideologies. Random coefficient models based on female observations from 48 countries. Only observation from countries with at least 30 active and 30 inactive female members included. Source: WVS-EVS-data and V-Dem data.

|                                                    | Model 1          | Model 2           | Model 3           | Model 4           | Model 5           |
|----------------------------------------------------|------------------|-------------------|-------------------|-------------------|-------------------|
| Membership in other leisure clubs or organizations |                  |                   |                   |                   |                   |
| Inactive member                                    | 0.001<br>(0.033) | -0.040<br>(0.034) | -0.049<br>(0.036) | -0.051<br>(0.037) | -0.051<br>(0.036) |
| Active member                                      | -0.045           | -0.073            | -0.085*           | -0.088**          | -0.086*           |

|                                                                |          |          |          |          |          |
|----------------------------------------------------------------|----------|----------|----------|----------|----------|
|                                                                | (0.054)  | (0.040)  | (0.035)  | (0.033)  | (0.035)  |
| Age / 10                                                       | 0.082**  | 0.084**  | 0.085**  | 0.085**  | 0.085**  |
|                                                                | (0.015)  | (0.015)  | (0.014)  | (0.014)  | (0.014)  |
| Educational level (ref. category: "Incomplete primary school") |          |          |          |          |          |
| Complete primary school                                        | -0.146*  | -0.146*  | -0.151*  | -0.147*  | -0.152*  |
|                                                                | (0.065)  | (0.065)  | (0.066)  | (0.067)  | (0.067)  |
| Incomplete secondary school: techn. / vocat. type              | -0.273** | -0.273** | -0.273** | -0.272** | -0.280** |
|                                                                | (0.066)  | (0.066)  | (0.066)  | (0.065)  | (0.066)  |
| Complete secondary school: techn./vocat. type                  | -0.520** | -0.523** | -0.521** | -0.514** | -0.525** |
|                                                                | (0.071)  | (0.071)  | (0.072)  | (0.069)  | (0.073)  |
| Incomplete secondary school: university-prep. Type             | -0.452** | -0.454** | -0.441** | -0.431** | -0.442** |
|                                                                | (0.071)  | (0.071)  | (0.068)  | (0.069)  | (0.070)  |
| Complete secondary school: university-prep. type               | -0.575** | -0.577** | -0.577** | -0.576** | -0.579** |
|                                                                | (0.073)  | (0.073)  | (0.072)  | (0.072)  | (0.073)  |
| Some university-level education, without degree                | -0.824** | -0.827** | -0.828** | -0.828** | -0.836** |
|                                                                | (0.083)  | (0.083)  | (0.082)  | (0.081)  | (0.081)  |
| University-level education, with degree                        | -0.945** | -0.945** | -0.942** | -0.933** | -0.945** |
|                                                                | (0.086)  | (0.086)  | (0.084)  | (0.080)  | (0.083)  |
| Income decile (self-perceived)                                 | -0.004   | -0.005   | -0.005   | -0.006   | -0.005   |
|                                                                | (0.011)  | (0.011)  | (0.010)  | (0.010)  | (0.010)  |
| Unemployed                                                     | 0.028    | 0.029    | 0.037    | 0.022    | 0.034    |
|                                                                | (0.051)  | (0.052)  | (0.053)  | (0.049)  | (0.053)  |
| Married                                                        | 0.116**  | 0.117**  | 0.118**  | 0.118**  | 0.118**  |
|                                                                | (0.027)  | (0.027)  | (0.027)  | (0.027)  | (0.027)  |
| Child                                                          | 0.005    | 0.006    | 0.003    | 0.002    | 0.006    |
|                                                                | (0.036)  | (0.036)  | (0.037)  | (0.037)  | (0.037)  |
| Religious                                                      | 0.148**  | 0.147**  | 0.152**  | 0.153**  | 0.151**  |
|                                                                | (0.036)  | (0.036)  | (0.035)  | (0.035)  | (0.035)  |
| Sports participation                                           |          |          |          |          |          |
| Active member                                                  |          | 0.034    | 0.032    | -0.219   | -0.114*  |
|                                                                |          | (0.051)  | (0.046)  | (0.229)  | (0.058)  |
| Inactive member                                                |          | 0.149*   | 0.123**  | 0.066    | -0.045   |
|                                                                |          | (0.064)  | (0.044)  | (0.055)  | (0.062)  |
| Deciles of WPE Index (ref. category= 1st decile)               |          |          |          |          |          |
| 2nd decile                                                     |          |          |          | 0.104    |          |
|                                                                |          |          |          | (0.116)  |          |
| 3rd decile                                                     |          |          |          | 0.160    |          |
|                                                                |          |          |          | (0.175)  |          |
| 4th decile                                                     |          |          |          | 0.410    |          |
|                                                                |          |          |          | (0.329)  |          |
| 5th decile                                                     |          |          |          | 0.962**  |          |
|                                                                |          |          |          | (0.301)  |          |
| 6th decile                                                     |          |          |          | -1.116** |          |
|                                                                |          |          |          | (0.339)  |          |
| 7th decile                                                     |          |          |          | -1.304** |          |
|                                                                |          |          |          | (0.329)  |          |
| 8th decile                                                     |          |          |          | -1.611** |          |
|                                                                |          |          |          | (0.385)  |          |
| 9th decile                                                     |          |          |          | -1.352** |          |
|                                                                |          |          |          | (0.353)  |          |

---

|                                             |           |
|---------------------------------------------|-----------|
| 10th decile                                 | -1.370*** |
| Sports participation × deciles of WPE Index | (0.387)   |
| Inactive member × 2nd decile of WPE Index   | 0.129     |
|                                             | (0.112)   |
| Inactive member × 3rd decile of WPE Index   | 0.136     |
|                                             | (0.137)   |
| Inactive member × 4th decile of WPE Index   | 0.136     |
|                                             | (0.142)   |
| Inactive member × 5th decile of WPE Index   | -0.282    |
|                                             | (0.178)   |
| Inactive member × 6th decile of WPE Index   | 0.499**   |
|                                             | (0.174)   |
| Inactive member × 7th decile of WPE Index   | -0.182    |
|                                             | (0.108)   |
| Inactive member × 8th decile of WPE Index   | 0.170     |
|                                             | (0.117)   |
| Inactive member × 9th decile of WPE Index   | -0.087    |
|                                             | (0.091)   |
| Inactive member × 10th decile of WPE Index  | 0.103     |
|                                             | (0.126)   |
| Active member × 2nd decile of WPE Index     | 0.294     |
|                                             | (0.312)   |
| Active member × 3rd decile of WPE Index     | 0.231     |
|                                             | (0.244)   |
| Active member × 4th decile of WPE Index     | 0.566*    |
|                                             | (0.246)   |
| Active member × 5th decile of WPE Index     | 0.012     |
|                                             | (0.268)   |
| Active member × 6th decile of WPE Index     | 0.971*    |
|                                             | (0.392)   |
| Active member × 7th decile of WPE Index     | 0.073     |
|                                             | (0.248)   |
| Active member × 8th decile of WPE Index     | 0.258     |
|                                             | (0.232)   |
| Active member × 9th decile of WPE Index     | 0.179     |
|                                             | (0.231)   |
| Active member × 10th decile of WPE Index    | 0.085     |
|                                             | (0.232)   |

---

|                                                      |                     |
|------------------------------------------------------|---------------------|
| Deciles of EG Index (reference category= 1st decile) |                     |
| 2nd decile                                           | 0.213*<br>(0.093)   |
| 3rd decile                                           | 0.694***<br>(0.106) |
| 4th decile                                           | 0.870***<br>(0.189) |
| 5th decile                                           | 0.536**<br>(0.181)  |
| 6th decile                                           | 0.250<br>(0.249)    |
| 7th decile                                           | 1.117*<br>(0.565)   |
| 8th decile                                           | 1.319***<br>(0.312) |
| 9th decile                                           | 0.923*<br>(0.438)   |
| 10th decile                                          | 2.451***<br>(0.614) |
| Sports participation × decile of EG Index            |                     |
| Inactive member × 2nd decile of EG Index             | -0.073<br>(0.120)   |
| Inactive member × 3rd decile of EG Index             | 0.147<br>(0.093)    |
| Inactive member × 4th decile of EG Index             | 0.083<br>(0.200)    |
| Inactive member × 5th decile of EG Index             | 0.005<br>(0.144)    |
| Inactive member × 6th decile of EG Index             | 0.308**<br>(0.107)  |
| Inactive member × 7th decile of EG Index             | 0.413*<br>(0.173)   |
| Inactive member × 8th decile of EG Index             | 0.432*<br>(0.210)   |
| Inactive member × 9th decile of EG Index             | 0.252*<br>(0.114)   |
| Inactive member × 10th decile of EG Index            | 0.108<br>(0.074)    |
| Active member × 2nd decile of EG Index               | 0.364***<br>(0.105) |
| Active member × 3rd decile of EG Index               | 0.106<br>(0.088)    |
| Active member × 4th decile of EG Index               | 0.129<br>(0.077)    |

|                                                                  |                     |                     |                      |                      |                      |
|------------------------------------------------------------------|---------------------|---------------------|----------------------|----------------------|----------------------|
| Active member × 5th decile of EG Index                           |                     |                     |                      |                      | 0.052<br>(0.154)     |
| Active member × 6th decile of EG Index                           |                     |                     |                      |                      | 0.310***<br>(0.089)  |
| Active member × 7th decile of EG Index                           |                     |                     |                      |                      | 0.474**<br>(0.175)   |
| Active member × 8th decile of EG Index                           |                     |                     |                      |                      | 0.703**<br>(0.232)   |
| Active member × 9th decile of EG Index                           |                     |                     |                      |                      | 0.131<br>(0.091)     |
| Active member × 10th decile of EG Index                          |                     |                     |                      |                      | -0.342*<br>(0.147)   |
| Intercept                                                        | 3.645***<br>(0.218) | 3.635***<br>(0.220) | 3.647***<br>(0.219)  | 4.226***<br>(0.305)  | 2.718***<br>(0.233)  |
| Random coefficients:                                             |                     |                     |                      |                      |                      |
| Log. standard deviation of random intercept: $\hat{\sigma}_{u0}$ | 0.224**<br>(0.085)  | 0.223**<br>(0.085)  | -1.320***<br>(0.213) | -1.545***<br>(0.264) | -2.178***<br>(0.457) |
| Log. standard deviation of residuals: $\hat{\sigma}_{\epsilon}$  | 0.601***<br>(0.026) | 0.600***<br>(0.026) | 0.598***<br>(0.025)  | 0.597***<br>(0.025)  | 0.598***<br>(0.025)  |
| Log. standard deviation of inactive member: $\hat{\sigma}_{u1}$  |                     |                     | -1.501***<br>(0.160) | -1.740***<br>(0.176) | -1.819***<br>(0.244) |
| Log. standard deviation of active member: $\hat{\sigma}_{u2}$    |                     |                     | 0.221*<br>(0.087)    | 0.003<br>(0.114)     | 0.045<br>(0.086)     |
| N                                                                | 45446               | 45446               | 45446                | 45446                | 45446                |
| AIC                                                              | 183900.5            | 183876.4            | 183778.2             | 183642.2             | 183712.4             |
| BIC                                                              | 184118.6            | 184111.9            | 184031.2             | 184061.0             | 184131.2             |

Robust standard errors in parentheses; \*  $p < 0.05$ , \*\*  $p < 0.01$ , \*\*\*  $p < 0.001$ ; the coefficients of the dummy variables for the years 2006-2016 have been omitted from the table due to limited space.

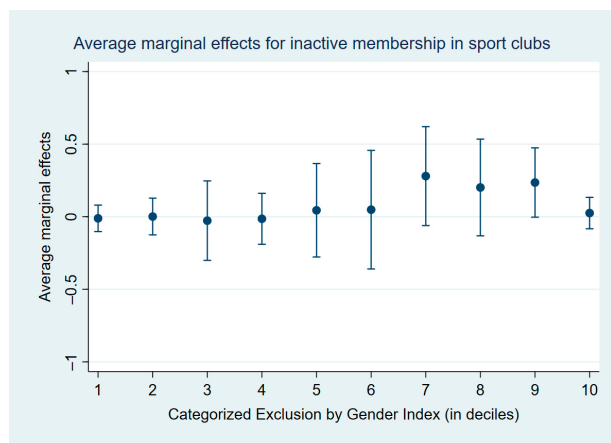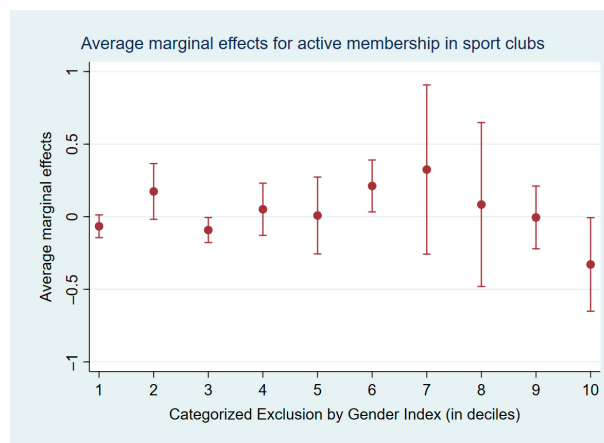

(a)

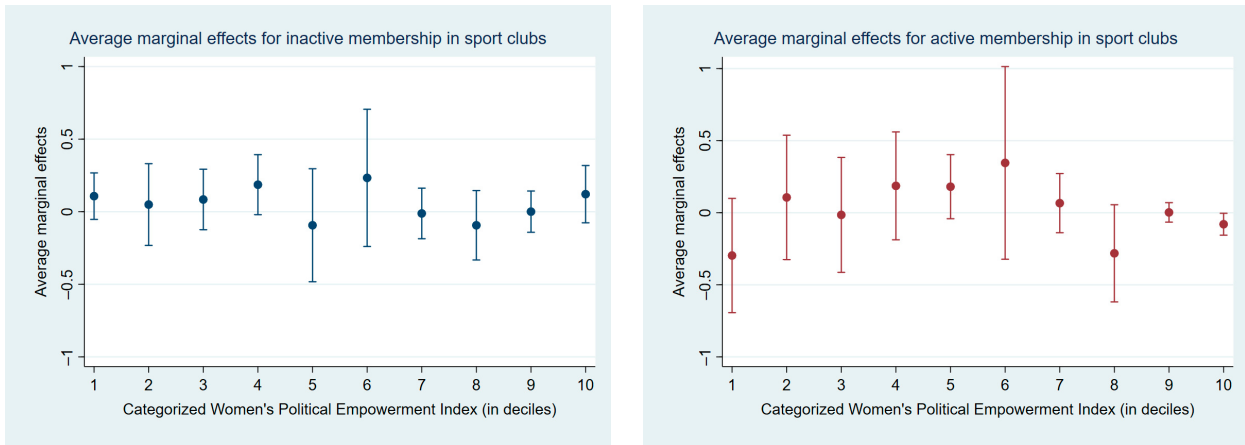

(b)

**Figure S2.** Average marginal effects for active and inactive membership in sports clubs conditioned on the deciles of the Exclusion by Gender Index (a) and conditioned on the deciles of the Women's Political Empowerment Index (b). 95% confidence intervals using robust standard errors. Results based on female observations from countries having at least 30 active and 30 inactive sports club members. Source WVS-EVS data and V-Dem data.

### 3. Models for different age groups

#### 3.1 Men aged 18-24 years

**Table S4.** The partial effects from sports participation and the other covariates on sexist gender ideologies. Random coefficient models based on the subpopulation of 18-24-year-old men. Robust standard errors in brackets. Source: WVS-EVS data and V-Dem data.

|                                                                                    | Model 1            | Model 2             | Model 3             | Model 4             | Model 5             |
|------------------------------------------------------------------------------------|--------------------|---------------------|---------------------|---------------------|---------------------|
| Membership in other leisure clubs or organizations (ref. category: "Not a member") |                    |                     |                     |                     |                     |
| Inactive member                                                                    | 0.025<br>(0.064)   | -0.016<br>(0.063)   | -0.021<br>(0.062)   | -0.019<br>(0.063)   | -0.034<br>(0.062)   |
| Active member                                                                      | -0.126*<br>(0.056) | -0.156**<br>(0.060) | -0.158**<br>(0.060) | -0.158**<br>(0.061) | -0.168**<br>(0.058) |
| Age / 10                                                                           | 0.022<br>(0.104)   | 0.027<br>(0.104)    | 0.019<br>(0.106)    | 0.011<br>(0.108)    | 0.020<br>(0.106)    |
| Educational level (ref. category: "Incomplete primary school")                     |                    |                     |                     |                     |                     |
| Complete primary school                                                            | 0.093<br>(0.133)   | 0.095<br>(0.133)    | 0.093<br>(0.132)    | 0.102<br>(0.130)    | 0.098<br>(0.130)    |
| Incomplete secondary school: technical / vocational type                           | -0.120<br>(0.122)  | -0.119<br>(0.120)   | -0.122<br>(0.119)   | -0.133<br>(0.116)   | -0.131<br>(0.118)   |

|                                                          |                      |                      |                      |                      |                      |
|----------------------------------------------------------|----------------------|----------------------|----------------------|----------------------|----------------------|
| Complete secondary school: technical / vocational type   | -0.254<br>(0.135)    | -0.254<br>(0.133)    | -0.245<br>(0.132)    | -0.247<br>(0.131)    | -0.246<br>(0.129)    |
| Incomplete secondary school: university-preparatory type | -0.203<br>(0.126)    | -0.205<br>(0.125)    | -0.201<br>(0.123)    | -0.194<br>(0.122)    | -0.204<br>(0.121)    |
| Complete secondary school: university-preparatory type   | -0.268*<br>(0.128)   | -0.271*<br>(0.127)   | -0.260*<br>(0.124)   | -0.250*<br>(0.122)   | -0.260*<br>(0.123)   |
| Some university-level education, without degree          | -0.419**<br>(0.129)  | -0.421***<br>(0.128) | -0.415***<br>(0.126) | -0.414***<br>(0.125) | -0.422***<br>(0.124) |
| University-level education, with degree                  | -0.568***<br>(0.145) | -0.571***<br>(0.143) | -0.563***<br>(0.140) | -0.550***<br>(0.137) | -0.568***<br>(0.138) |
| Income decile (self-perceived)                           | 0.000<br>(0.011)     | -0.001<br>(0.011)    | -0.000<br>(0.011)    | -0.004<br>(0.011)    | -0.001<br>(0.011)    |
| Unemployed                                               | 0.136**<br>(0.051)   | 0.136**<br>(0.051)   | 0.135**<br>(0.052)   | 0.131*<br>(0.053)    | 0.137**<br>(0.053)   |
| Married                                                  | -0.076<br>(0.075)    | -0.076<br>(0.075)    | -0.070<br>(0.074)    | -0.067<br>(0.074)    | -0.067<br>(0.073)    |
| Child                                                    | 0.019<br>(0.082)     | 0.020<br>(0.082)     | 0.024<br>(0.081)     | 0.017<br>(0.082)     | 0.017<br>(0.080)     |
| Religious                                                | 0.098*<br>(0.049)    | 0.097*<br>(0.049)    | 0.094<br>(0.050)     | 0.089<br>(0.049)     | 0.094<br>(0.048)     |
| Sports participation (ref. category: "Not a member")     |                      |                      |                      |                      |                      |
| Active member                                            |                      | 0.060<br>(0.070)     | 0.057<br>(0.071)     | 0.102<br>(0.117)     | 0.022<br>(0.186)     |
| Inactive member                                          |                      | 0.125*<br>(0.062)    | 0.147*<br>(0.065)    | 0.072<br>(0.082)     | 0.093<br>(0.160)     |
| Deciles of WPE Index (ref. category= 1st decile)         |                      |                      |                      |                      |                      |
| 2nd decile                                               |                      |                      |                      | -1.425**<br>(0.548)  |                      |
| 3rd decile                                               |                      |                      |                      | -1.271**<br>(0.459)  |                      |
| 4th decile                                               |                      |                      |                      | -2.036***<br>(0.479) |                      |
| 5th decile                                               |                      |                      |                      | -2.641***<br>(0.503) |                      |
| 6th decile                                               |                      |                      |                      | -2.321***<br>(0.397) |                      |
| 7th decile                                               |                      |                      |                      | -2.093***<br>(0.518) |                      |
| 8th decile                                               |                      |                      |                      | -2.803***<br>(0.325) |                      |
| 9th decile                                               |                      |                      |                      | -3.162***<br>(0.375) |                      |
| 10th decile                                              |                      |                      |                      | -4.094***            |                      |
| Sports participation × deciles of WPE Index              |                      |                      |                      | (0.378)              |                      |
| Inactive member × 2nd decile of WPE Index                |                      |                      |                      | 0.134<br>(0.202)     |                      |
| Inactive member × 3rd decile of WPE Index                |                      |                      |                      | -0.319               |                      |

---

|                                                 |          |  |
|-------------------------------------------------|----------|--|
|                                                 | (0.216)  |  |
| Inactive member × 4th decile of WPE Index       | 0.052    |  |
|                                                 | (0.270)  |  |
| Inactive member × 5th decile of WPE Index       | -0.143   |  |
|                                                 | (0.171)  |  |
| Inactive member × 6th decile of WPE Index       | 0.431    |  |
|                                                 | (0.221)  |  |
| Inactive member × 7th decile of WPE Index       | 0.085    |  |
|                                                 | (0.390)  |  |
| Inactive member × 8th decile of WPE Index       | -0.100   |  |
|                                                 | (0.132)  |  |
| Inactive member × 9th decile of WPE Index       | 0.301    |  |
|                                                 | (0.187)  |  |
| Inactive member × 10th decile of WPE Index      | 0.281    |  |
|                                                 | (0.209)  |  |
| Active member × 2nd decile of WPE Index         | -0.309   |  |
|                                                 | (0.343)  |  |
| Active member × 3rd decile of WPE Index         | -0.126   |  |
|                                                 | (0.268)  |  |
| Active member × 4th decile of WPE Index         | -0.167   |  |
|                                                 | (0.257)  |  |
| Active member × 5th decile of WPE Index         | -0.355*  |  |
|                                                 | (0.168)  |  |
| Active member × 6th decile of WPE Index         | 0.160    |  |
|                                                 | (0.207)  |  |
| Active member × 7th decile of WPE Index         | -0.168   |  |
|                                                 | (0.268)  |  |
| Active member × 8th decile of WPE Index         | 0.153    |  |
|                                                 | (0.232)  |  |
| Active member × 9th decile of WPE Index         | 0.055    |  |
|                                                 | (0.193)  |  |
| Active member × 10th decile of WPE Index        | 0.118    |  |
|                                                 | (0.242)  |  |
| Deciles of EG Index (ref. category= 1st decile) |          |  |
| 2nd decile                                      | 0.633    |  |
|                                                 | (0.353)  |  |
| 3rd decile                                      | 0.830*   |  |
|                                                 | (0.330)  |  |
| 4th decile                                      | 1.704*** |  |
|                                                 | (0.424)  |  |
| 5th decile                                      | 1.929*** |  |

---

|                                           |          |
|-------------------------------------------|----------|
|                                           | (0.459)  |
| 6th decile                                | 1.695*** |
|                                           | (0.388)  |
| 7th decile                                | 2.000*** |
|                                           | (0.449)  |
| 8th decile                                | 2.446*** |
|                                           | (0.427)  |
| 9th decile                                | 2.797*** |
|                                           | (0.476)  |
| 10th decile                               | 2.909*** |
|                                           | (0.642)  |
| Sports participation × decile of EG Index |          |
| Inactive member × 2nd decile of EG Index  | 0.142    |
|                                           | (0.189)  |
| Inactive member × 3rd decile of EG Index  | 0.309    |
|                                           | (0.237)  |
| Inactive member × 4th decile of EG Index  | 0.185    |
|                                           | (0.316)  |
| Inactive member × 5th decile of EG Index  | 0.071    |
|                                           | (0.288)  |
| Inactive member × 6th decile of EG Index  | -0.096   |
|                                           | (0.330)  |
| Inactive member × 7th decile of EG Index  | 0.009    |
|                                           | (0.211)  |
| Inactive member × 8th decile of EG Index  | -0.423*  |
|                                           | (0.197)  |
| Inactive member × 9th decile of EG Index  | -0.009   |
|                                           | (0.278)  |
| Inactive member × 10th decile of EG Index | 0.205    |
|                                           | (0.176)  |
| Active member × 2nd decile of EG Index    | 0.144    |
|                                           | (0.221)  |
| Active member × 3rd decile of EG Index    | 0.110    |
|                                           | (0.220)  |
| Active member × 4th decile of EG Index    | 0.321    |
|                                           | (0.265)  |
| Active member × 5th decile of EG Index    | -0.078   |
|                                           | (0.239)  |
| Active member × 6th decile of EG Index    | -0.285   |
|                                           | (0.289)  |
| Active member × 7th decile of EG Index    | 0.099    |
|                                           | (0.217)  |

|                                                                  |                    |                    |                     |                     |                     |
|------------------------------------------------------------------|--------------------|--------------------|---------------------|---------------------|---------------------|
| Active member × 8th decile of EG Index                           |                    |                    |                     |                     | 0.204<br>(0.230)    |
| Active member × 9th decile of EG Index                           |                    |                    |                     |                     | 0.001<br>(0.332)    |
| Active member × 10th decile of EG Index                          |                    |                    |                     |                     | -0.160<br>(0.361)   |
| Intercept                                                        | 4.860**<br>(0.348) | 4.840**<br>(0.351) | 4.850**<br>(0.353)  | 7.001**<br>(0.432)  | 3.297**<br>(0.407)  |
| Random coefficients:                                             |                    |                    |                     |                     |                     |
| Log. standard deviation of random intercept: $\hat{\sigma}_{u0}$ | 0.406**<br>(0.064) | 0.408**<br>(0.063) | 0.409**<br>(0.064)  | 0.024<br>(0.086)    | 0.117<br>(0.087)    |
| Log. standard deviation of residuals: $\hat{\sigma}_{\epsilon}$  | 0.612**<br>(0.026) | 0.612**<br>(0.026) | 0.609**<br>(0.026)  | 0.607**<br>(0.026)  | 0.608**<br>(0.026)  |
| Log. standard deviation of inactive member: $\hat{\sigma}_{u1}$  |                    |                    | -1.572**<br>(0.427) | -1.679**<br>(0.518) | -1.911**<br>(0.691) |
| Log. standard deviation of active member: $\hat{\sigma}_{u2}$    |                    |                    | -1.219**<br>(0.286) | -1.230**<br>(0.298) | -1.332**<br>(0.303) |
| N                                                                | 10085              | 10085              | 10085               | 10085               | 10085               |
| AIC                                                              | 41326.8            | 41326.1            | 41316.8             | 41281.9             | 41305.9             |
| BIC                                                              | 41514.5            | 41528.2            | 41533.4             | 41693.3             | 41717.3             |

Robust standard errors in parentheses; \*  $p < 0.05$ , \*\*  $p < 0.01$ , \*\*\*  $p < 0.001$ ; the coefficients of the dummy variables for the years 2006-2016 have been omitted from the table due to limited space.

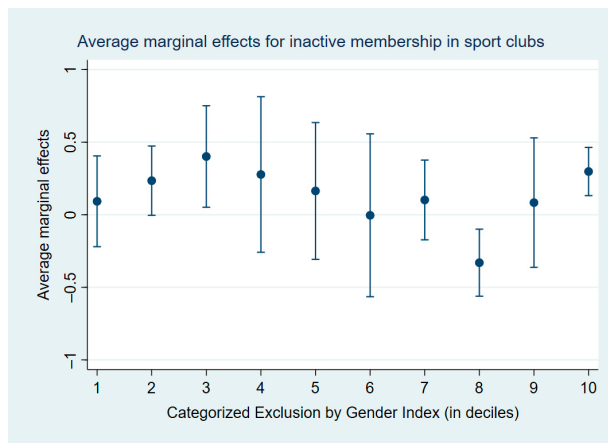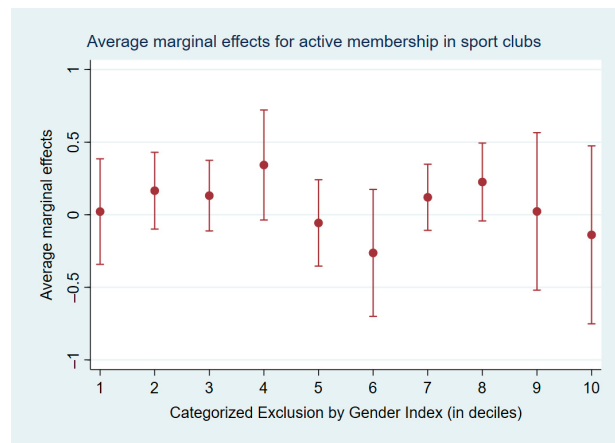

(a)

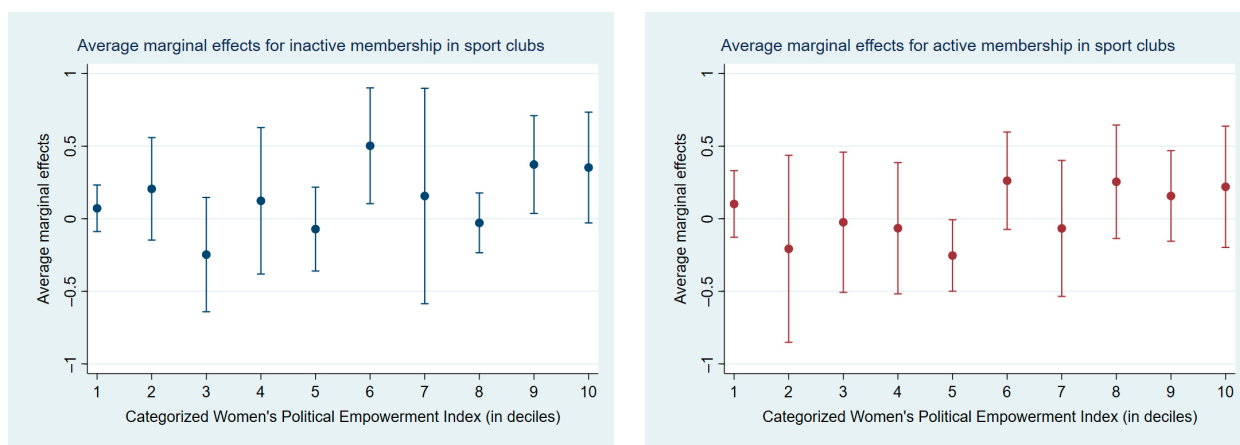

(b)

**Figure S3.** Average marginal effects for active and inactive membership in sports clubs conditioned on the deciles of the Exclusion by Gender Index (a) and conditioned on the deciles of the Women's Political Empowerment Index (b). 95% confidence intervals using robust standard errors. Source: Own calculation based on 18-24-year-old men from the aggregated WVS-EVS data set.

### 3.2 Men over 25 years of age

**Table S5.** The partial effects from sports participation and the other covariates on sexist gender ideologies. Random coefficient models based on the subpopulation of men over 25 years of age. Robust standard errors in brackets. Source: WVS-EVS data and V-Dem data.

|                                                                                    | Model 1              | Model 2              | Model 3              | Model 4              | Model 5              |
|------------------------------------------------------------------------------------|----------------------|----------------------|----------------------|----------------------|----------------------|
| Membership in other leisure clubs or organizations (ref. category: "Not a member") |                      |                      |                      |                      |                      |
| Inactive member                                                                    | -0.011<br>(0.031)    | -0.031<br>(0.030)    | -0.035<br>(0.030)    | -0.034<br>(0.031)    | -0.037<br>(0.031)    |
| Active member                                                                      | -0.047<br>(0.042)    | -0.072<br>(0.039)    | -0.080*<br>(0.038)   | -0.081*<br>(0.038)   | -0.081*<br>(0.038)   |
| Age / 10                                                                           | 0.029*<br>(0.015)    | 0.031*<br>(0.015)    | 0.032*<br>(0.014)    | 0.032*<br>(0.014)    | 0.032*<br>(0.014)    |
| Educational level (ref. category: "Incomplete primary school")                     |                      |                      |                      |                      |                      |
| Complete primary school                                                            | -0.130<br>(0.071)    | -0.130<br>(0.071)    | -0.129<br>(0.071)    | -0.135<br>(0.072)    | -0.132<br>(0.071)    |
| Incomplete secondary school: technical / vocational type                           | -0.251***<br>(0.076) | -0.253***<br>(0.076) | -0.251**<br>(0.076)  | -0.260***<br>(0.078) | -0.257***<br>(0.076) |
| Complete secondary school: technical / vocational type                             | -0.417***<br>(0.075) | -0.421***<br>(0.074) | -0.420***<br>(0.074) | -0.425***<br>(0.074) | -0.427***<br>(0.073) |
| Incomplete secondary school: university-preparatory type                           | -0.397***<br>(0.085) | -0.401***<br>(0.084) | -0.396***<br>(0.083) | -0.401***<br>(0.083) | -0.399***<br>(0.083) |
| Complete secondary school: university-preparatory type                             | -0.504***<br>(0.073) | -0.510***<br>(0.072) | -0.508***<br>(0.072) | -0.516***<br>(0.073) | -0.511***<br>(0.072) |

|                                                      |           |           |           |           |           |
|------------------------------------------------------|-----------|-----------|-----------|-----------|-----------|
| Some university-level education, without degree      | -0.623*** | -0.629*** | -0.628*** | -0.640*** | -0.635*** |
|                                                      | (0.086)   | (0.086)   | (0.085)   | (0.085)   | (0.085)   |
| University-level education, with degree              | -0.779*** | -0.785*** | -0.784*** | -0.784*** | -0.780*** |
|                                                      | (0.084)   | (0.084)   | (0.084)   | (0.084)   | (0.084)   |
| Income decile (self-perceived)                       | -0.004    | -0.005    | -0.004    | -0.005    | -0.004    |
|                                                      | (0.009)   | (0.009)   | (0.009)   | (0.009)   | (0.009)   |
| Unemployed                                           | 0.034     | 0.037     | 0.037     | 0.028     | 0.036     |
|                                                      | (0.050)   | (0.050)   | (0.050)   | (0.049)   | (0.050)   |
| Married                                              | -0.060*   | -0.059*   | -0.058*   | -0.055    | -0.052    |
|                                                      | (0.029)   | (0.029)   | (0.028)   | (0.028)   | (0.028)   |
| Child                                                | 0.058     | 0.059     | 0.060     | 0.061     | 0.056     |
|                                                      | (0.031)   | (0.031)   | (0.031)   | (0.031)   | (0.031)   |
| Religious                                            | 0.122*    | 0.121*    | 0.120*    | 0.117*    | 0.117*    |
|                                                      | (0.048)   | (0.048)   | (0.048)   | (0.048)   | (0.048)   |
| Sports participation (ref. category: "Not a member") |           |           |           |           |           |
| Active member                                        |           | 0.086*    | 0.078*    | -0.046    | -0.065    |
|                                                      |           | (0.039)   | (0.037)   | (0.127)   | (0.061)   |
| Inactive member                                      |           | 0.064     | 0.066     | 0.071     | -0.035    |
|                                                      |           | (0.044)   | (0.049)   | (0.075)   | (0.072)   |
| Deciles of WPE Index (ref. category= 1st decile)     |           |           |           |           |           |
| 2nd decile                                           |           |           |           | -0.276    |           |
|                                                      |           |           |           | (0.450)   |           |
| 3rd decile                                           |           |           |           | -1.273**  |           |
|                                                      |           |           |           | (0.456)   |           |
| 4th decile                                           |           |           |           | -0.980*   |           |
|                                                      |           |           |           | (0.465)   |           |
| 5th decile                                           |           |           |           | -1.973*** |           |
|                                                      |           |           |           | (0.429)   |           |
| 6th decile                                           |           |           |           | -1.827*** |           |
|                                                      |           |           |           | (0.425)   |           |
| 7th decile                                           |           |           |           | -2.444*** |           |
|                                                      |           |           |           | (0.402)   |           |
| 8th decile                                           |           |           |           | -2.333*** |           |
|                                                      |           |           |           | (0.424)   |           |
| 9th decile                                           |           |           |           | -3.158*** |           |
|                                                      |           |           |           | (0.439)   |           |
| 10th decile                                          |           |           |           | -2.102*** |           |
|                                                      |           |           |           | (0.440)   |           |
| Sports participation × deciles of WPE Index          |           |           |           |           |           |
| Inactive member × 2nd decile of WPE Index            |           |           |           | -0.145    |           |
|                                                      |           |           |           | (0.169)   |           |
| Inactive member × 3rd decile of WPE Index            |           |           |           | -0.106    |           |
|                                                      |           |           |           | (0.178)   |           |
| Inactive member × 4th decile of WPE Index            |           |           |           | 0.194     |           |
|                                                      |           |           |           | (0.189)   |           |
| Inactive member × 5th decile of WPE Index            |           |           |           | 0.070     |           |
|                                                      |           |           |           | (0.156)   |           |
| Inactive member × 6th decile of WPE Index            |           |           |           | -0.175    |           |

|                                                 |          |  |
|-------------------------------------------------|----------|--|
|                                                 | (0.180)  |  |
| Inactive member × 7th decile of WPE Index       | -0.046   |  |
|                                                 | (0.140)  |  |
| Inactive member × 8th decile of WPE Index       | -0.053   |  |
|                                                 | (0.111)  |  |
| Inactive member × 9th decile of WPE Index       | 0.073    |  |
|                                                 | (0.179)  |  |
| Inactive member × 10th decile of WPE Index      | 0.107    |  |
|                                                 | (0.149)  |  |
| Active member × 2nd decile of WPE Index         | 0.226    |  |
|                                                 | (0.150)  |  |
| Active member × 3rd decile of WPE Index         | 0.238    |  |
|                                                 | (0.155)  |  |
| Active member × 4th decile of WPE Index         | 0.365*   |  |
|                                                 | (0.167)  |  |
| Active member × 5th decile of WPE Index         | 0.163    |  |
|                                                 | (0.135)  |  |
| Active member × 6th decile of WPE Index         | 0.154    |  |
|                                                 | (0.245)  |  |
| Active member × 7th decile of WPE Index         | 0.075    |  |
|                                                 | (0.192)  |  |
| Active member × 8th decile of WPE Index         | 0.012    |  |
|                                                 | (0.143)  |  |
| Active member × 9th decile of WPE Index         | 0.083    |  |
|                                                 | (0.162)  |  |
| Active member × 10th decile of WPE Index        | -0.004   |  |
|                                                 | (0.152)  |  |
| Deciles of EG Index (ref. category= 1st decile) |          |  |
| 2nd decile                                      | 0.411*** |  |
|                                                 | (0.124)  |  |
| 3rd decile                                      | 0.492**  |  |
|                                                 | (0.176)  |  |
| 4th decile                                      | 0.717**  |  |
|                                                 | (0.237)  |  |
| 5th decile                                      | 0.577*   |  |
|                                                 | (0.279)  |  |
| 6th decile                                      | 1.426*** |  |
|                                                 | (0.372)  |  |
| 7th decile                                      | 2.334*** |  |
|                                                 | (0.343)  |  |
| 8th decile                                      | 1.822*** |  |
|                                                 | (0.412)  |  |
| 9th decile                                      | 1.802**  |  |
|                                                 | (0.637)  |  |

|                                                                  |                     |                     |                     |                     |                     |
|------------------------------------------------------------------|---------------------|---------------------|---------------------|---------------------|---------------------|
| 10th decile                                                      |                     |                     |                     |                     | 2.866***<br>(0.464) |
| Sports participation × decile of EG Index                        |                     |                     |                     |                     |                     |
| Inactive member × 2nd decile of EG Index                         |                     |                     |                     |                     | 0.390<br>(0.221)    |
| Inactive member × 3rd decile of EG Index                         |                     |                     |                     |                     | -0.021<br>(0.108)   |
| Inactive member × 4th decile of EG Index                         |                     |                     |                     |                     | 0.386<br>(0.203)    |
| Inactive member × 5th decile of EG Index                         |                     |                     |                     |                     | -0.053<br>(0.209)   |
| Inactive member × 6th decile of EG Index                         |                     |                     |                     |                     | 0.326*<br>(0.157)   |
| Inactive member × 7th decile of EG Index                         |                     |                     |                     |                     | 0.004<br>(0.122)    |
| Inactive member × 8th decile of EG Index                         |                     |                     |                     |                     | 0.063<br>(0.152)    |
| Inactive member × 9th decile of EG Index                         |                     |                     |                     |                     | -0.218<br>(0.182)   |
| Inactive member × 10th decile of EG Index                        |                     |                     |                     |                     | 0.177<br>(0.098)    |
| Active member × 2nd decile of EG Index                           |                     |                     |                     |                     | 0.256*<br>(0.110)   |
| Active member × 3rd decile of EG Index                           |                     |                     |                     |                     | 0.007<br>(0.087)    |
| Active member × 4th decile of EG Index                           |                     |                     |                     |                     | 0.342***<br>(0.084) |
| Active member × 5th decile of EG Index                           |                     |                     |                     |                     | -0.049<br>(0.162)   |
| Active member × 6th decile of EG Index                           |                     |                     |                     |                     | 0.220*<br>(0.111)   |
| Active member × 7th decile of EG Index                           |                     |                     |                     |                     | 0.282*<br>(0.122)   |
| Active member × 8th decile of EG Index                           |                     |                     |                     |                     | 0.387**<br>(0.123)  |
| Active member × 9th decile of EG Index                           |                     |                     |                     |                     | 0.151*<br>(0.074)   |
| Active member × 10th decile of EG Index                          |                     |                     |                     |                     | 0.093<br>(0.130)    |
| Intercept                                                        | 5.235***<br>(0.235) | 5.222***<br>(0.235) | 5.225***<br>(0.235) | 6.969***<br>(0.392) | 3.868***<br>(0.227) |
| Random coefficients:                                             |                     |                     |                     |                     |                     |
| Log. standard deviation of random intercept: $\hat{\sigma}_{uo}$ | 0.370***<br>(0.057) | 0.373***<br>(0.057) | 0.371***<br>(0.056) | 0.056<br>(0.085)    | 0.091<br>(0.084)    |
| Log. standard deviation of residuals: $\hat{\sigma}_{\epsilon}$  | 0.624***            | 0.624***            | 0.622***            | 0.621***            | 0.621***            |

|                                                                 |          |          |           |           |           |
|-----------------------------------------------------------------|----------|----------|-----------|-----------|-----------|
|                                                                 | (0.022)  | (0.022)  | (0.022)   | (0.022)   | (0.022)   |
| Log. standard deviation of inactive member: $\hat{\sigma}_{u1}$ |          |          | -1.215*** | -1.182*** | -1.306*** |
|                                                                 |          |          | (0.205)   | (0.196)   | (0.202)   |
| Log. standard deviation of active member: $\hat{\sigma}_{u2}$   |          |          | -1.683*** | -1.810*** | -2.238*** |
|                                                                 |          |          | (0.187)   | (0.281)   | (0.407)   |
| N                                                               | 47732    | 47732    | 47732     | 47732     | 47732     |
| AIC                                                             | 195491.3 | 195482.9 | 195429.3  | 195374.0  | 195348.9  |
| BIC                                                             | 195719.4 | 195728.6 | 195692.5  | 195874.1  | 195848.9  |

Robust standard errors in parentheses; \*  $p < 0.05$ , \*\*  $p < 0.01$ , \*\*\*  $p < 0.001$ ; the coefficients of the dummy variables for the years 2006-2016 have been omitted from the table due to limited space.

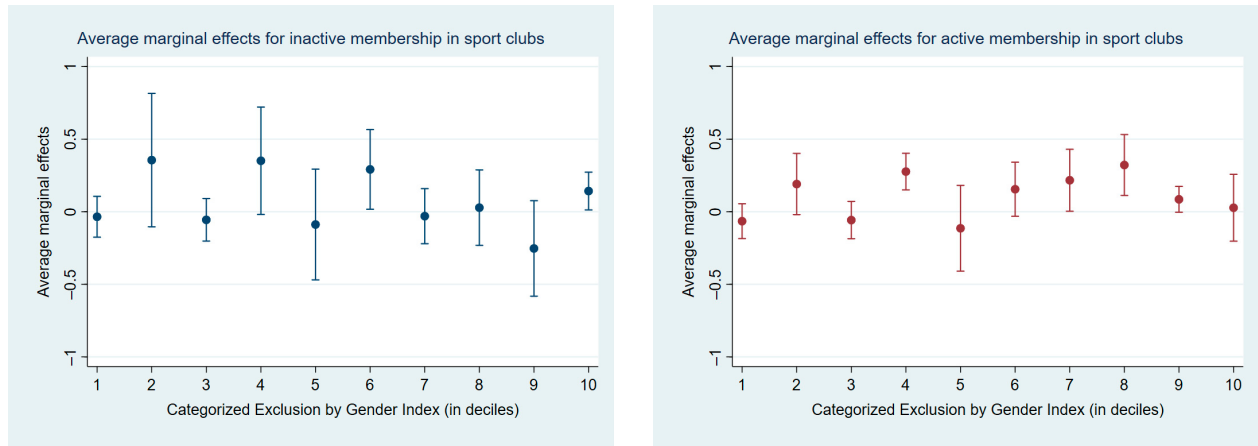

(a)

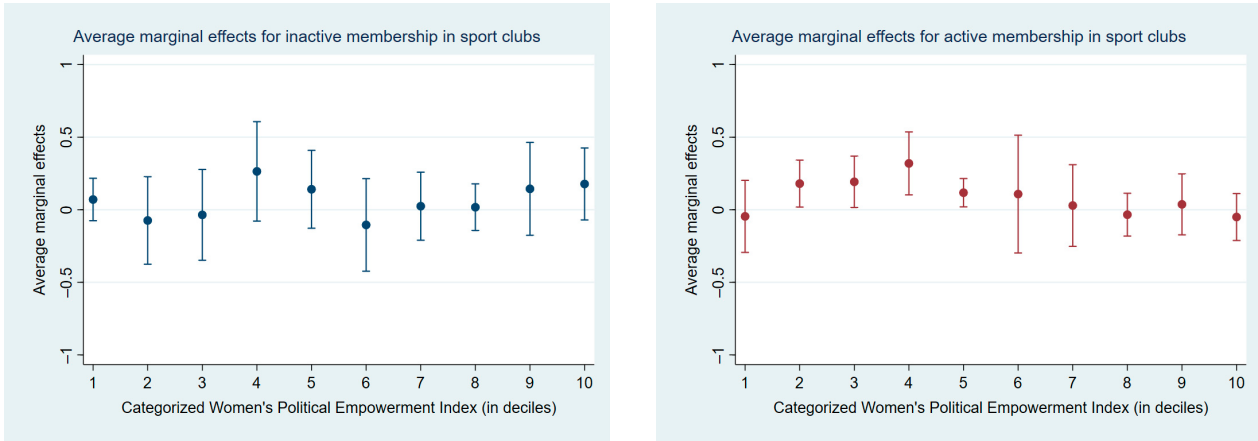

(b)

**Figure S4.** Average marginal effects for active and inactive membership in sports clubs conditioned on the deciles of the Exclusion by Gender Index (a) and conditioned on the deciles of the Women's Political Empowerment Index (b). 95% confidence intervals using robust standard errors. Source: Own calculations based on men over 25 years of age from the aggregated WVS-EVS data set.

### 3.3. Women 18-24 years

**Table S6.** The partial effects from sports participation and the other covariates on sexist gender ideologies. Random coefficient models based on the subpopulation of 18-24-year-old women. Robust standard errors in brackets. Source: WVS-EVS data and V-Dem data.

|                                                                                    | Model 1              | Model 2              | Model 3              | Model 4              | Model 5              |
|------------------------------------------------------------------------------------|----------------------|----------------------|----------------------|----------------------|----------------------|
| Membership in other leisure clubs or organizations (ref. category: "Not a member") |                      |                      |                      |                      |                      |
| Inactive member                                                                    | -0.066<br>(0.068)    | -0.076<br>(0.067)    | -0.082<br>(0.068)    | -0.077<br>(0.068)    | -0.083<br>(0.068)    |
| Active member                                                                      | -0.135<br>(0.076)    | -0.154*<br>(0.063)   | -0.164**<br>(0.057)  | -0.162**<br>(0.055)  | -0.164**<br>(0.058)  |
| Age / 10                                                                           | 0.160<br>(0.097)     | 0.165<br>(0.098)     | 0.154<br>(0.098)     | 0.144<br>(0.098)     | 0.152<br>(0.096)     |
| Educational level (ref. category: "Incomplete primary school")                     |                      |                      |                      |                      |                      |
| Complete primary school                                                            | -0.180<br>(0.120)    | -0.181<br>(0.119)    | -0.180<br>(0.120)    | -0.171<br>(0.121)    | -0.172<br>(0.122)    |
| Incomplete secondary school: technical / vocational type                           | -0.298*<br>(0.118)   | -0.299*<br>(0.118)   | -0.290*<br>(0.116)   | -0.294*<br>(0.119)   | -0.304*<br>(0.122)   |
| Complete secondary school: technical / vocational type                             | -0.546***<br>(0.120) | -0.548***<br>(0.120) | -0.533***<br>(0.120) | -0.530***<br>(0.120) | -0.540***<br>(0.122) |
| Incomplete secondary school: university-preparatory type                           | -0.544***<br>(0.125) | -0.546***<br>(0.125) | -0.526***<br>(0.125) | -0.507***<br>(0.127) | -0.521***<br>(0.128) |
| Complete secondary school: university-preparatory type                             | -0.645***<br>(0.129) | -0.648***<br>(0.129) | -0.631***<br>(0.128) | -0.621***<br>(0.128) | -0.630***<br>(0.131) |
| Some university-level education, without degree                                    | -0.858***<br>(0.127) | -0.859***<br>(0.127) | -0.852***<br>(0.125) | -0.848***<br>(0.125) | -0.858***<br>(0.125) |
| University-level education, with degree                                            | -0.970***<br>(0.147) | -0.972***<br>(0.147) | -0.957***<br>(0.145) | -0.943***<br>(0.143) | -0.957***<br>(0.146) |
| Income decile (self-perceived)                                                     | -0.003<br>(0.014)    | -0.003<br>(0.013)    | -0.003<br>(0.013)    | -0.004<br>(0.013)    | -0.002<br>(0.014)    |
| Unemployed                                                                         | 0.028<br>(0.047)     | 0.029<br>(0.048)     | 0.043<br>(0.045)     | 0.033<br>(0.047)     | 0.042<br>(0.045)     |
| Married                                                                            | 0.277***<br>(0.055)  | 0.278***<br>(0.055)  | 0.275***<br>(0.055)  | 0.279***<br>(0.057)  | 0.274***<br>(0.056)  |
| Child                                                                              | 0.159**<br>(0.058)   | 0.160**<br>(0.058)   | 0.169**<br>(0.058)   | 0.163**<br>(0.058)   | 0.169**<br>(0.058)   |
| Religious                                                                          | 0.141**<br>(0.050)   | 0.141**<br>(0.049)   | 0.140**<br>(0.049)   | 0.141**<br>(0.047)   | 0.138**<br>(0.048)   |
| Sports participation (ref. category: "Not a member")                               |                      |                      |                      |                      |                      |
| Active member                                                                      |                      | 0.064<br>(0.105)     | 0.080<br>(0.092)     | -0.164<br>(0.378)    | 0.324*<br>(0.159)    |
| Inactive member                                                                    |                      | 0.020<br>(0.060)     | 0.015<br>(0.057)     | 0.158*<br>(0.064)    | 0.171<br>(0.092)     |
| Deciles of WPE Index (ref. category= 1st decile)                                   |                      |                      |                      |                      |                      |
| 2nd decile                                                                         |                      |                      |                      | -0.940*<br>(0.445)   |                      |
| 3rd decile                                                                         |                      |                      |                      | -0.740               |                      |

---

|                                             |           |
|---------------------------------------------|-----------|
|                                             | (0.436)   |
| 4th decile                                  | -1.639*** |
|                                             | (0.325)   |
| 5th decile                                  | -1.648*** |
|                                             | (0.307)   |
| 6th decile                                  | -1.793*** |
|                                             | (0.238)   |
| 7th decile                                  | -1.777*** |
|                                             | (0.308)   |
| 8th decile                                  | -2.278*** |
|                                             | (0.195)   |
| 9th decile                                  | -2.913*** |
|                                             | (0.283)   |
| 10th decile                                 | -3.375*** |
|                                             | (0.210)   |
| Sports participation × deciles of WPE Index |           |
| Inactive member × 2nd decile of WPE Index   | -0.366**  |
|                                             | (0.119)   |
| Inactive member × 3rd decile of WPE Index   | -0.174*   |
|                                             | (0.084)   |
| Inactive member × 4th decile of WPE Index   | 0.045     |
|                                             | (0.191)   |
| Inactive member × 5th decile of WPE Index   | -0.132    |
|                                             | (0.156)   |
| Inactive member × 6th decile of WPE Index   | -0.357    |
|                                             | (0.208)   |
| Inactive member × 7th decile of WPE Index   | -0.183    |
|                                             | (0.197)   |
| Inactive member × 8th decile of WPE Index   | -0.028    |
|                                             | (0.409)   |
| Inactive member × 9th decile of WPE Index   | -0.153    |
|                                             | (0.128)   |
| Inactive member × 10th decile of WPE Index  | -0.018    |
|                                             | (0.147)   |
| Active member × 2nd decile of WPE Index     | -0.544    |
|                                             | (0.571)   |
| Active member × 3rd decile of WPE Index     | 0.649     |
|                                             | (0.441)   |
| Active member × 4th decile of WPE Index     | 0.126     |
|                                             | (0.427)   |
| Active member × 5th decile of WPE Index     | 0.360     |
|                                             | (0.516)   |
| Active member × 6th decile of WPE Index     | 0.401     |

---

|                                                 |          |
|-------------------------------------------------|----------|
|                                                 | (0.423)  |
| Active member × 7th decile of WPE Index         | 0.101    |
|                                                 | (0.434)  |
| Active member × 8th decile of WPE Index         | 0.512    |
|                                                 | (0.542)  |
| Active member × 9th decile of WPE Index         | 0.166    |
|                                                 | (0.413)  |
| Active member × 10th decile of WPE Index        | 0.264    |
|                                                 | (0.382)  |
| Deciles of EG Index (ref. category= 1st decile) |          |
| 2nd decile                                      | 0.870*** |
|                                                 | (0.215)  |
| 3rd decile                                      | 0.885*** |
|                                                 | (0.236)  |
| 4th decile                                      | 1.590*** |
|                                                 | (0.367)  |
| 5th decile                                      | 1.816*** |
|                                                 | (0.381)  |
| 6th decile                                      | 1.962*** |
|                                                 | (0.274)  |
| 7th decile                                      | 1.574*** |
|                                                 | (0.348)  |
| 8th decile                                      | 2.081*** |
|                                                 | (0.351)  |
| 9th decile                                      | 2.372*** |
|                                                 | (0.423)  |
| 10th decile                                     | 2.113*** |
|                                                 | (0.491)  |
| Sports participation × decile of EG Index       |          |
| Inactive member × 2nd decile of EG Index        | -0.506*  |
|                                                 | (0.202)  |
| Inactive member × 3rd decile of EG Index        | -0.405** |
|                                                 | (0.145)  |
| Inactive member × 4th decile of EG Index        | -0.387*  |
|                                                 | (0.162)  |
| Inactive member × 5th decile of EG Index        | 0.088    |
|                                                 | (0.231)  |
| Inactive member × 6th decile of EG Index        | -0.012   |
|                                                 | (0.255)  |
| Inactive member × 7th decile of EG Index        | 0.231    |
|                                                 | (0.155)  |
| Inactive member × 8th decile of EG Index        | -0.111   |
|                                                 | (0.111)  |
| Inactive member × 9th decile of EG Index        | -0.206   |
|                                                 | (0.105)  |

|                                                                  |                    |                    |                      |                     |                      |
|------------------------------------------------------------------|--------------------|--------------------|----------------------|---------------------|----------------------|
| Inactive member × 10th decile of EG Index                        |                    |                    |                      |                     | -0.164<br>(0.155)    |
| Active member × 2nd decile of EG Index                           |                    |                    |                      |                     | -0.642**<br>(0.203)  |
| Active member × 3rd decile of EG Index                           |                    |                    |                      |                     | -0.277<br>(0.299)    |
| Active member × 4th decile of EG Index                           |                    |                    |                      |                     | -0.381<br>(0.274)    |
| Active member × 5th decile of EG Index                           |                    |                    |                      |                     | 0.188<br>(0.226)     |
| Active member × 6th decile of EG Index                           |                    |                    |                      |                     | 0.136<br>(0.414)     |
| Active member × 7th decile of EG Index                           |                    |                    |                      |                     | -0.171<br>(0.447)    |
| Active member × 8th decile of EG Index                           |                    |                    |                      |                     | -0.220<br>(0.334)    |
| Active member × 9th decile of EG Index                           |                    |                    |                      |                     | -0.288<br>(0.192)    |
| Active member × 10th decile of EG Index                          |                    |                    |                      |                     | -1.103***<br>(0.300) |
| Intercept                                                        | 3.757**<br>(0.287) | 3.744**<br>(0.291) | 3.761**<br>(0.287)   | 5.752**<br>(0.304)  | 2.315**<br>(0.322)   |
| Random coefficients:                                             |                    |                    |                      |                     |                      |
| Log. standard deviation of random intercept: $\hat{\sigma}_{u0}$ | 0.223**<br>(0.067) | 0.225**<br>(0.067) | 0.224**<br>(0.068)   | -0.266**<br>(0.099) | -0.092<br>(0.118)    |
| Log. standard deviation of residuals: $\hat{\sigma}_{\epsilon}$  | 0.599**<br>(0.025) | 0.599**<br>(0.025) | 0.594**<br>(0.025)   | 0.593**<br>(0.024)  | 0.594**<br>(0.025)   |
| Log. standard deviation of inactive member: $\hat{\sigma}_{u1}$  |                    |                    | -1.732***<br>(0.383) | -2.384<br>(1.598)   | -19.208<br>(36.720)  |
| Log. standard deviation of active member: $\hat{\sigma}_{u1}$    |                    |                    | -0.755**<br>(0.180)  | -0.947**<br>(0.244) | -1.017**<br>(0.257)  |
| N                                                                | 10504              | 10504              | 10504                | 10504               | 10504                |
| AIC                                                              | 42731.4            | 42734.3            | 42704.0              | 42654.0             | 42673.8              |
| BIC                                                              | 42920.1            | 42937.5            | 42921.8              | 43067.8             | 43087.6              |

Robust standard errors in parentheses; \*  $p < 0.05$ , \*\*  $p < 0.01$ , \*\*\*  $p < 0.001$ ; the coefficients of the dummy variables for the years 2006-2016 have been omitted from the table due to limited space.

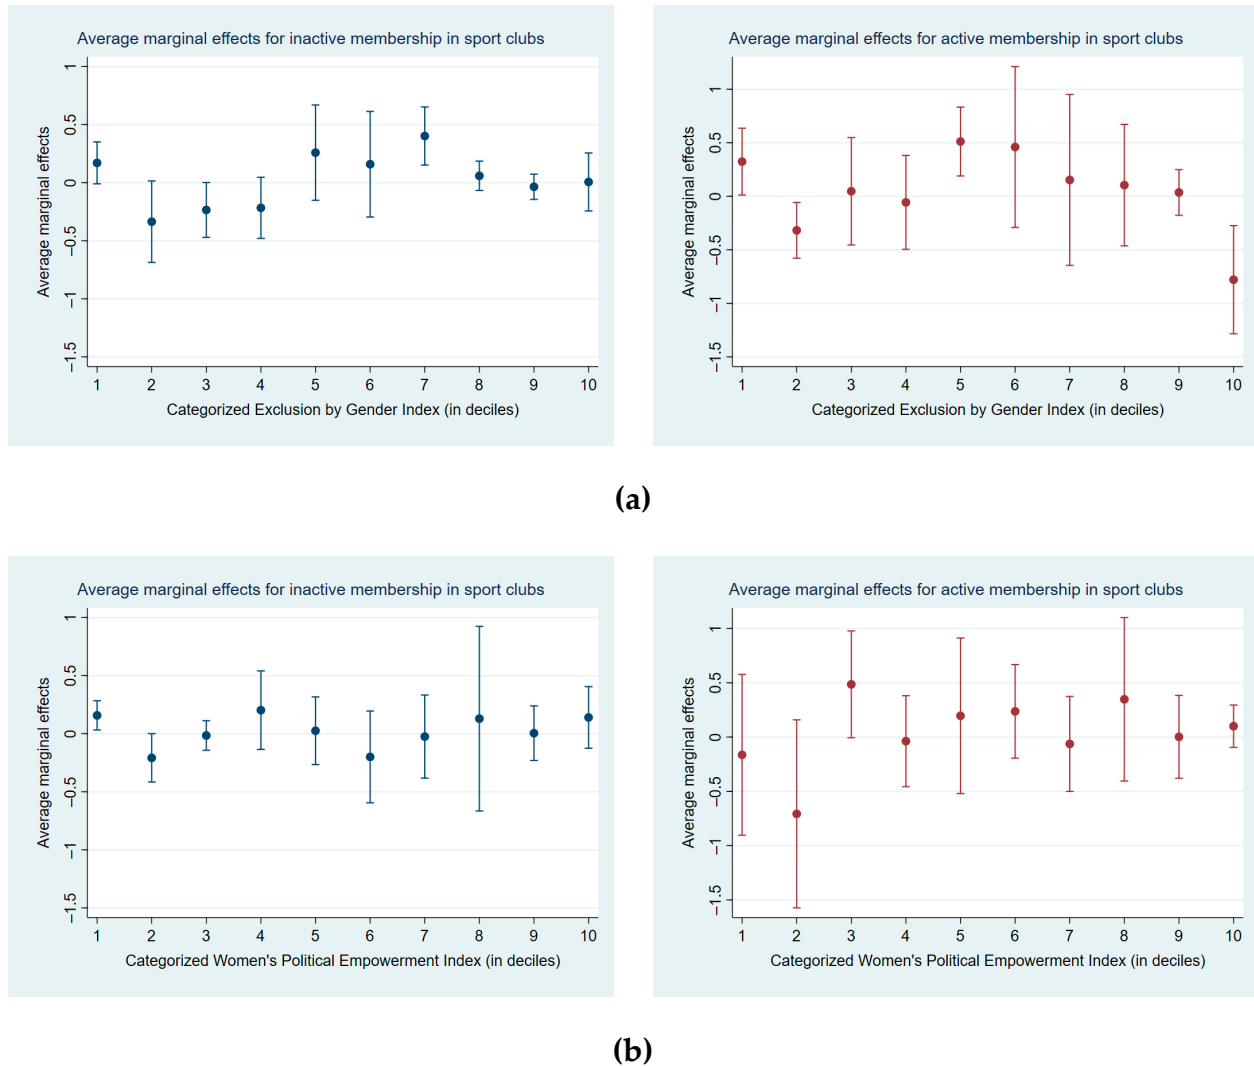

**Figure S5.** Average marginal effects for active and inactive membership in sports clubs conditioned on the deciles of the Exclusion by Gender Index (a) and conditioned on the deciles of the Women's Political Empowerment Index (b). 95% confidence intervals using robust standard errors. Source: Own calculations based on 18-24-year-old women from the aggregated WVS-EVS data set.

### 3.4 Women over 25 years of age

**Table S7.** The partial effects from sports participation and the other covariates on sexist gender ideologies. Random coefficient models based on the subpopulation of women over 25 years of age. Robust standard errors in brackets. Source: WVS-EVS data and V-Dem data.

|                                                                                    | Model 1           | Model 2            | Model 3             | Model 4             | Model 5             |
|------------------------------------------------------------------------------------|-------------------|--------------------|---------------------|---------------------|---------------------|
| Membership in other leisure clubs or organizations (ref. category: "Not a member") |                   |                    |                     |                     |                     |
| Inactive member                                                                    | -0.014<br>(0.032) | -0.049<br>(0.033)  | -0.058<br>(0.034)   | -0.056<br>(0.034)   | -0.061<br>(0.035)   |
| Active member                                                                      | -0.074<br>(0.050) | -0.096*<br>(0.039) | -0.106**<br>(0.036) | -0.105**<br>(0.035) | -0.107**<br>(0.036) |
| Age / 10                                                                           | 0.099***          | 0.100***           | 0.100***            | 0.102***            | 0.101***            |

|                                                                |           |           |           |           |           |
|----------------------------------------------------------------|-----------|-----------|-----------|-----------|-----------|
|                                                                | (0.013)   | (0.013)   | (0.013)   | (0.013)   | (0.013)   |
| Educational level (ref. category: "Incomplete primary school") |           |           |           |           |           |
| Complete primary school                                        | -0.130*   | -0.130*   | -0.134*   | -0.133*   | -0.134*   |
|                                                                | (0.053)   | (0.053)   | (0.054)   | (0.055)   | (0.053)   |
| Incomplete secondary school: technical / vocational type       | -0.334*** | -0.334*** | -0.337*** | -0.343*** | -0.339*** |
|                                                                | (0.059)   | (0.059)   | (0.060)   | (0.061)   | (0.061)   |
| Complete secondary school: technical / vocational type         | -0.554*** | -0.556*** | -0.557*** | -0.553*** | -0.559*** |
|                                                                | (0.060)   | (0.060)   | (0.061)   | (0.060)   | (0.060)   |
| Incomplete secondary school: university-preparatory type       | -0.378*** | -0.380*** | -0.372*** | -0.367*** | -0.374*** |
|                                                                | (0.067)   | (0.068)   | (0.064)   | (0.063)   | (0.064)   |
| Complete secondary school: university-preparatory type         | -0.576*** | -0.579*** | -0.579*** | -0.584*** | -0.579*** |
|                                                                | (0.069)   | (0.069)   | (0.069)   | (0.071)   | (0.069)   |
| Some university-level education, without degree                | -0.822*** | -0.825*** | -0.826*** | -0.830*** | -0.829*** |
|                                                                | (0.073)   | (0.073)   | (0.073)   | (0.074)   | (0.073)   |
| University-level education, with degree                        | -0.947*** | -0.949*** | -0.945*** | -0.937*** | -0.940*** |
|                                                                | (0.075)   | (0.075)   | (0.074)   | (0.073)   | (0.074)   |
| Income decile (self-perceived)                                 | -0.007    | -0.007    | -0.007    | -0.008    | -0.007    |
|                                                                | (0.010)   | (0.009)   | (0.009)   | (0.008)   | (0.009)   |
| Unemployed                                                     | -0.013    | -0.012    | -0.009    | -0.022    | -0.013    |
|                                                                | (0.055)   | (0.055)   | (0.057)   | (0.052)   | (0.057)   |
| Married                                                        | 0.120**   | 0.120**   | 0.121**   | 0.123**   | 0.125**   |
|                                                                | (0.026)   | (0.026)   | (0.025)   | (0.025)   | (0.025)   |
| Child                                                          | -0.004    | -0.003    | -0.005    | -0.004    | -0.009    |
|                                                                | (0.034)   | (0.034)   | (0.034)   | (0.034)   | (0.034)   |
| Religious                                                      | 0.146**   | 0.145**   | 0.149**   | 0.148**   | 0.148**   |
|                                                                |           |           |           |           |           |
| Sports participation (ref. category: "Not a member")           | (0.034)   | (0.034)   | (0.033)   | (0.033)   | (0.033)   |
| Active member                                                  |           | 0.017     | 0.006     | -0.287    | -0.124    |
|                                                                |           | (0.045)   | (0.044)   | (0.177)   | (0.072)   |
| Inactive member                                                |           | 0.149*    | 0.099*    | 0.040     | -0.104    |
|                                                                |           | (0.066)   | (0.045)   | (0.071)   | (0.076)   |
| Deciles of the WPE Index (ref. category=1st decile)            |           |           |           |           |           |
| 2nd decile                                                     |           |           |           | 0.077     |           |
|                                                                |           |           |           | (0.423)   |           |
| 3rd decile                                                     |           |           |           | -0.898*   |           |
|                                                                |           |           |           | (0.406)   |           |
| 4th decile                                                     |           |           |           | -0.763    |           |
|                                                                |           |           |           | (0.424)   |           |
| 5th decile                                                     |           |           |           | -1.395*** |           |
|                                                                |           |           |           | (0.374)   |           |
| 6th decile                                                     |           |           |           | -1.258**  |           |
|                                                                |           |           |           | (0.393)   |           |
| 7th decile                                                     |           |           |           | -2.242*** |           |
|                                                                |           |           |           | (0.376)   |           |
| 8th decile                                                     |           |           |           | -2.164*** |           |
|                                                                |           |           |           | (0.402)   |           |
| 9th decile                                                     |           |           |           | -2.760*** |           |
|                                                                |           |           |           | (0.405)   |           |
| 10th decile                                                    |           |           |           | -2.385*** |           |

---

|                                             |         |
|---------------------------------------------|---------|
| Sports participation × deciles of WPE Index | (0.394) |
| Inactive member × 2nd decile of WPE Index   | 0.146   |
|                                             | (0.167) |
| Inactive member × 3rd decile of WPE Index   | 0.114   |
|                                             | (0.116) |
| Inactive member × 4th decile of WPE Index   | 0.010   |
|                                             | (0.126) |
| Inactive member × 5th decile of WPE Index   | 0.052   |
|                                             | (0.235) |
| Inactive member × 6th decile of WPE Index   | 0.194   |
|                                             | (0.259) |
| Inactive member × 7th decile of WPE Index   | 0.042   |
|                                             | (0.128) |
| Inactive member × 8th decile of WPE Index   | -0.055  |
|                                             | (0.143) |
| Inactive member × 9th decile of WPE Index   | -0.045  |
|                                             | (0.102) |
| Inactive member × 10th decile of WPE Index  | 0.084   |
|                                             | (0.126) |
| Active member × 2nd decile of WPE Index     | 0.329   |
|                                             | (0.275) |
| Active member × 3rd decile of WPE Index     | 0.258   |
|                                             | (0.274) |
| Active member × 4th decile of WPE Index     | 0.308   |
|                                             | (0.227) |
| Active member × 5th decile of WPE Index     | 0.460*  |
|                                             | (0.195) |
| Active member × 6th decile of WPE Index     | 0.588   |
|                                             | (0.403) |
| Active member × 7th decile of WPE Index     | 0.521*  |
|                                             | (0.205) |
| Active member × 8th decile of WPE Index     | 0.118   |
|                                             | (0.214) |
| Active member × 9th decile of WPE Index     | 0.231   |
|                                             | (0.183) |
| Active member × 10th decile of WPE Index    | 0.209   |
|                                             | (0.180) |
| Deciles of EG Index (ref. category= 1st     |         |

|                                           |                     |
|-------------------------------------------|---------------------|
| decile)                                   |                     |
| 2nd decile                                | 0.325**<br>(0.126)  |
| 3rd decile                                | -0.150<br>(0.246)   |
| 4th decile                                | 0.062<br>(0.290)    |
| 5th decile                                | 0.405<br>(0.288)    |
| 6th decile                                | 1.294**<br>(0.404)  |
| 7th decile                                | 1.861***<br>(0.362) |
| 8th decile                                | 1.232**<br>(0.413)  |
| 9th decile                                | 1.512*<br>(0.609)   |
| 10th decile                               | 2.152***<br>(0.476) |
| Sports participation × decile of EG Index |                     |
| Inactive member × 2nd decile of EG Index  | 0.112<br>(0.115)    |
| Inactive member × 3rd decile of EG Index  | 0.249*<br>(0.119)   |
| Inactive member × 4th decile of EG Index  | 0.196<br>(0.173)    |
| Inactive member × 5th decile of EG Index  | 0.120<br>(0.168)    |
| Inactive member × 6th decile of EG Index  | 0.153<br>(0.266)    |
| Inactive member × 7th decile of EG Index  | 0.306<br>(0.201)    |
| Inactive member × 8th decile of EG Index  | 0.393*<br>(0.188)   |
| Inactive member × 9th decile of EG Index  | 0.420**<br>(0.144)  |
| Inactive member × 10th decile of EG Index | 0.145<br>(0.100)    |
| Active member × 2nd decile of EG Index    | 0.265*<br>(0.130)   |
| Active member × 3rd decile of EG Index    | 0.112<br>(0.086)    |
| Active member × 4th decile of EG Index    | 0.224<br>(0.127)    |
| Active member × 5th decile of EG Index    | 0.152<br>(0.134)    |
| Active member × 6th decile of EG Index    | 0.396*              |

|                                                                  |          |          |           |           |           |
|------------------------------------------------------------------|----------|----------|-----------|-----------|-----------|
|                                                                  |          |          |           |           | (0.201)   |
| Active member × 7th decile of EG Index                           |          |          |           | 0.278     | (0.259)   |
| Active member × 8th decile of EG Index                           |          |          |           | 0.267     | (0.305)   |
| Active member × 9th decile of EG Index                           |          |          |           | 0.025     | (0.136)   |
| Active member × 10th decile of EG Index                          |          |          |           | -0.181    | (0.159)   |
| Intercept                                                        | 3.943*** | 3.937*** | 3.955***  | 5.331***  | 3.075***  |
|                                                                  | (0.190)  | (0.191)  | (0.193)   | (0.344)   | (0.221)   |
| Random coefficients:                                             |          |          |           |           |           |
| Log. standard deviation of random intercept: $\hat{\sigma}_{u0}$ | 0.276*** | 0.276*** | 0.275***  | -0.153    | 0.019     |
|                                                                  | (0.061)  | (0.061)  | (0.061)   | (0.093)   | (0.086)   |
| Log. standard deviation of residuals: $\hat{\sigma}_{\epsilon}$  | 0.609*** | 0.609*** | 0.607***  | 0.606***  | 0.607***  |
|                                                                  | (0.022)  | (0.022)  | (0.021)   | (0.021)   | (0.021)   |
| Log. standard deviation of inactive member: $\hat{\sigma}_{u1}$  |          |          | -1.381*** | -1.438*** | -1.550*** |
|                                                                  |          |          | (0.182)   | (0.214)   | (0.213)   |
| Log. standard deviation of active member: $\hat{\sigma}_{u1}$    |          |          | -1.327*** | -1.413*** | -1.545**  |
|                                                                  |          |          | (0.286)   | (0.367)   | (0.477)   |
| N                                                                | 50576    | 50576    | 50576     | 50576     | 50576     |
| AIC                                                              | 205640.2 | 205619.5 | 205550.3  | 205421.9  | 205504.7  |
| BIC                                                              | 205869.8 | 205866.8 | 205815.2  | 205925.3  | 206008.1  |

Robust standard errors in parentheses; \*  $p < 0.05$ , \*\*  $p < 0.01$ , \*\*\*  $p < 0.001$ ; the coefficients of the dummy variables for the years 2006-2016 have been omitted from the table due to limited space.

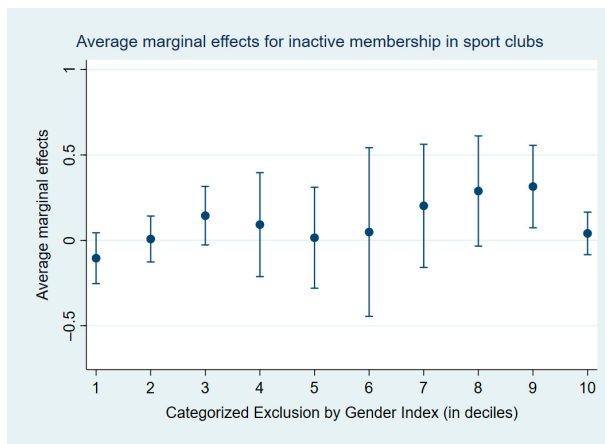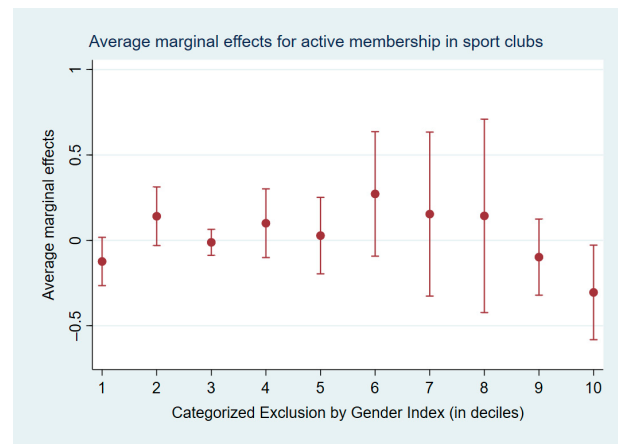

(a)

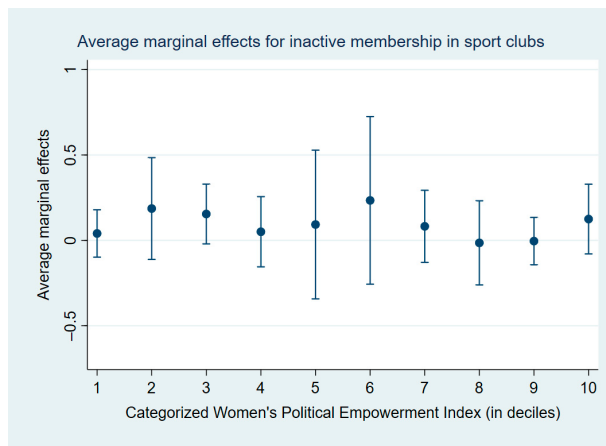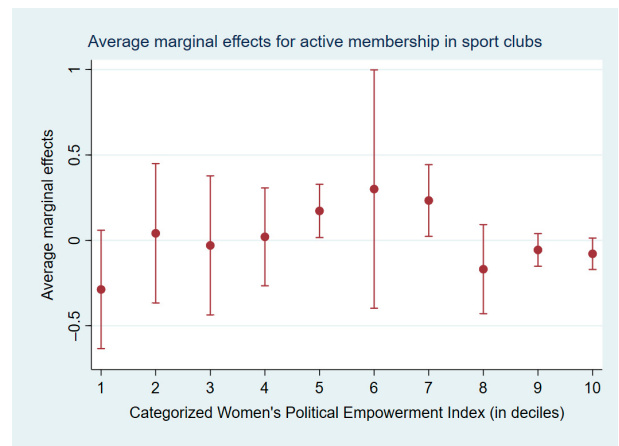

(b)

**Figure S6.** Average marginal effects for active and inactive membership in sports clubs conditioned on the deciles of the Exclusion by Gender Index (a) and conditioned on the deciles of the Women's Political Empowerment Index (b). 95% confidence intervals using robust standard errors. Results based on women over 25 years of age. Source: WVS-EVS-data.
